# Supplementary material for: The Teamwork in Assertive Community Treatment (TACT) Scale: Development and Validation
Source: Atypon-hosted journal article supplement (doi:10.1176/appi.ps.201100338), 2012-11-01
Supplement: 1108_ds001.pdf [file 1108_ds001.pdf]

## *Teamwork in Assertive Community Treatment (TACT)*

### References for Teamwork in Assertive Community Treatment Scale items

1. Levitt B, March JG: Organizational learning. *Annual Review of Sociology* 14:319-340, 1988
2. Tucker AL, Nembhard IM, Edmondson AC: Implementing new practices: an empirical study of organizational learning in hospital intensive care units. *Management Science* 53:894-907, 2007
3. Jehn KA: A multimethod examination of the benefits and detriments of intragroup conflict. *Administrative Science Quarterly* 40:256-282, 1995
4. Shah PP, Dirks KT, Chervany N: The multiple pathways of high performing groups: the interaction of social networks and group processes. *Journal of Organizational Behavior* 27:299-317, 2006
5. Edmondson AC: Psychological safety and learning behavior in work teams. *Administrative Science Quarterly* 44:350-383, 1999
6. Edmondson AC: Speaking up in the operating room: how team leaders promote learning in interdisciplinary action teams. *Journal of Management Studies* 40:1419-1452, 2003
7. Zohar D: A group-level model of safety climate: testing the effect of group climate on microaccidents in manufacturing jobs. *Journal of Applied Psychology* 85:587-596, 2000
8. Shah R, Ward PT: Defining and developing measures of lean production. *Journal of Operations Management* 25:785-805, 2007
9. Endsley MR: Theoretical underpinnings of situation awareness: a critical review; in *Situation Awareness Analysis and Measurement*. Edited by Endsley MR, Garland DJ. Mahwah, NJ: Lawrence Erlbaum and Associates, 2000

Teamwork in Assertive Community Treatment (TACT)

| Appendix A: TACT Definitions and Items                                                                                                                                             |                                                                                                                                                 |                                                                                                                                                                                                                                                                                                                                                                                                                                                                                                                                                                                  |
|------------------------------------------------------------------------------------------------------------------------------------------------------------------------------------|-------------------------------------------------------------------------------------------------------------------------------------------------|----------------------------------------------------------------------------------------------------------------------------------------------------------------------------------------------------------------------------------------------------------------------------------------------------------------------------------------------------------------------------------------------------------------------------------------------------------------------------------------------------------------------------------------------------------------------------------|
| Construct                                                                                                                                                                          | Definition                                                                                                                                      | Items                                                                                                                                                                                                                                                                                                                                                                                                                                                                                                                                                                            |
| <b>MODERATING PROCESSES</b>                                                                                                                                                        |                                                                                                                                                 |                                                                                                                                                                                                                                                                                                                                                                                                                                                                                                                                                                                  |
| Team Learning (1, also see2) – Exploration & Exploitation<br><br>1 – None<br>2 – Once or twice<br>3 – Three to five times<br>4 – More than five times (during the past six months) | Exploration is activities that identify the best practices that are currently available from external sources.                                  | <ul style="list-style-type: none"> <li>• I reviewed resource manuals and written materials for effective ACT team's work processes.</li> <li>• I reviewed emails and newsletters for effective ACT team's work processes.</li> <li>• I participated in training sessions for ACT teams.</li> <li>• I participated in training sessions related to ACT (e.g., integrated dual disorder treatment, supported employment, cognitive behavioral therapy).</li> <li>• I observed other ACT teams.</li> </ul>                                                                          |
|                                                                                                                                                                                    | Exploitation is activities that operationalize practices in a given setting and evaluate their performance.                                     | <ul style="list-style-type: none"> <li>• I learned new ideas for improving ACT team's work processes from my ACT team members.</li> <li>• I participated in selecting work process changes for implementation.</li> <li>• I helped to implement a planned change in my ACT team's work processes.</li> <li>• I participated in analyzing problems in my ACT team's work processes.</li> <li>• I helped to evaluate a planned change in my ACT team's work processes.</li> <li>• I reflected on our ACT team organization and improvement activities with my ACT team.</li> </ul> |
| Conflict & Constructive Controversy (3, 4)<br><br>1 – Strongly disagree<br>2 – Somewhat disagree<br>3 – Somewhat agree<br>4 – Strongly agree                                       | Conflict is perceived incompatibilities or discrepant views among team members.                                                                 | <ul style="list-style-type: none"> <li>• I felt that my ACT team members did NOT get along.</li> <li>• I felt that personality clashes were evident in my ACT team.</li> <li>• I felt that conflicts regarding ideas frequently arose in my ACT team.</li> <li>• I felt that my ACT team members had different opinions about how to organize work.</li> </ul>                                                                                                                                                                                                                   |
|                                                                                                                                                                                    | Constructive controversy is “the critical and open discussion of divergent perspectives including task related facts, data and opposing ideas.” | <ul style="list-style-type: none"> <li>• I felt that even when we disagreed on my ACT team, we communicated with respect for each other.</li> <li>• I felt that on my ACT team we used our opposing views to understand problems.</li> </ul>                                                                                                                                                                                                                                                                                                                                     |

Teamwork in Assertive Community Treatment (TACT)

| Appendix A: TACT Definitions and Items                                                                                                                |                                                                                                     |                                                                                                                                                                                                                                                                                                                                                                                                                                                                                                                                                                                                                                                                                                                                                                                                                                                                                                                              |
|-------------------------------------------------------------------------------------------------------------------------------------------------------|-----------------------------------------------------------------------------------------------------|------------------------------------------------------------------------------------------------------------------------------------------------------------------------------------------------------------------------------------------------------------------------------------------------------------------------------------------------------------------------------------------------------------------------------------------------------------------------------------------------------------------------------------------------------------------------------------------------------------------------------------------------------------------------------------------------------------------------------------------------------------------------------------------------------------------------------------------------------------------------------------------------------------------------------|
| Construct                                                                                                                                             | Definition                                                                                          | Items                                                                                                                                                                                                                                                                                                                                                                                                                                                                                                                                                                                                                                                                                                                                                                                                                                                                                                                        |
| <b>MODERATING STATES</b>                                                                                                                              |                                                                                                     |                                                                                                                                                                                                                                                                                                                                                                                                                                                                                                                                                                                                                                                                                                                                                                                                                                                                                                                              |
| Psychological Safety (5, 6)<br><br>1 – Strongly disagree<br>2 – Somewhat disagree<br>3 – Somewhat agree<br>4 – Strongly agree                         | “Team psychological safety is a shared belief that the team is safe for interpersonal risk taking.” | <ul style="list-style-type: none"> <li>• I felt that I could bring up personal safety issues, such as working in dangerous neighborhoods, to my ACT team members.</li> <li>• I felt that I could bring up mistakes and slips by my team in consumer care activities to my ACT team members.</li> <li>• I felt that I could bring up problems and tough issues, such as unprofessional behavior or missing team meetings, to my ACT team members.</li> <li>• I felt that if I made a mistake, other members of my ACT team would NOT hold it against me.</li> <li>• I felt that it was safe to take a risk to try new things in my ACT team.</li> <li>• I felt that my personal skills and talents were valued by other members of my ACT team.</li> <li>• I felt that it was easy to ask for a change in the time of a visit.</li> <li>• I felt that it was easy to ask for a partner to accompany me on a visit.</li> </ul> |
| Goal Agreement – Safety and Quality Orientation (7)<br><br>1 – Strongly disagree<br>2 – Somewhat disagree<br>3 – Somewhat agree<br>4 – Strongly agree | Goal agreement is a shared perception of the priority of a team's objectives.                       | <ul style="list-style-type: none"> <li>• I felt that I had the time during visits with consumers to assure safety for me or the consumers, even if it meant visiting fewer consumers.</li> <li>• I felt that I had the time to assure high quality visits with consumers, even if it meant visiting fewer consumers.</li> <li>• I felt that I had to make as many consumer visits as possible, even if it meant lower quality visits or less personal or consumer safety. (reverse coded)</li> </ul>                                                                                                                                                                                                                                                                                                                                                                                                                         |

Teamwork in Assertive Community Treatment (TACT)

| Appendix A: TACT Definitions and Items                                                                                                                                   |                                                                                                                                                                                                                                                                                                                         |                                                                                                                                                                                                                                                                                                                                                                                                                                                                                                                                                                                                                                                                   |
|--------------------------------------------------------------------------------------------------------------------------------------------------------------------------|-------------------------------------------------------------------------------------------------------------------------------------------------------------------------------------------------------------------------------------------------------------------------------------------------------------------------|-------------------------------------------------------------------------------------------------------------------------------------------------------------------------------------------------------------------------------------------------------------------------------------------------------------------------------------------------------------------------------------------------------------------------------------------------------------------------------------------------------------------------------------------------------------------------------------------------------------------------------------------------------------------|
| Construct                                                                                                                                                                | Definition                                                                                                                                                                                                                                                                                                              | Items                                                                                                                                                                                                                                                                                                                                                                                                                                                                                                                                                                                                                                                             |
| <b>MEDIATING PROCESSES</b>                                                                                                                                               |                                                                                                                                                                                                                                                                                                                         |                                                                                                                                                                                                                                                                                                                                                                                                                                                                                                                                                                                                                                                                   |
| Information Accessibility (8)<br><br>1 – Almost never<br>2 – Occasionally<br>3 – Often<br>4 – Usually<br>5 – Almost always                                               | Information accessibility is low waste in obtaining information.                                                                                                                                                                                                                                                        | <ul style="list-style-type: none"> <li>• I could obtain information about consumer issues, such as living arrangements or personal relationships, from my ACT team's daily meeting.</li> <li>• I could obtain information about consumers that I needed to provide care from other members of my ACT team.</li> <li>• I felt that the encounter notes for consumers who I was visiting were current.</li> <li>• I felt that the rehabilitation interventions for consumers to be seen that day were clearly discussed during daily team meetings.</li> </ul>                                                                                                      |
| <b>MEDIATING STATES</b>                                                                                                                                                  |                                                                                                                                                                                                                                                                                                                         |                                                                                                                                                                                                                                                                                                                                                                                                                                                                                                                                                                                                                                                                   |
| Situational Awareness – Encounter Preparedness & Consumer-Centered Care (9)<br><br>1 – Almost never<br>2 – Occasionally<br>3 – Often<br>4 – Usually<br>5 – Almost always | Encounter preparedness is the degree to which team members feel prepared to perform their daily tasks. A high degree of preparedness means that a team member knows her or his schedule, consumer information, purpose of the visit, and the activities/intervention that he or she should perform during an encounter. | <ul style="list-style-type: none"> <li>• I worked with consumers to develop rehabilitation goals.</li> <li>• I knew my complete consumer visit schedule.</li> <li>• I knew the medical diagnosis of the consumer before a visit.</li> <li>• I knew the functional assessment of the consumer before a visit.</li> <li>• I knew the rehabilitative intervention I should work on with the consumer before a visit.</li> <li>• I related my observations of the consumer during a visit to the consumer's medical diagnosis and functional assessment.</li> <li>• I knew how to code a visit's rehabilitation activities at the conclusion of the visit.</li> </ul> |
|                                                                                                                                                                          | Consumer-centered care is the degree to which teams integrate                                                                                                                                                                                                                                                           | <ul style="list-style-type: none"> <li>• Consumers participated in treatment planning meetings.</li> <li>• Rehabilitation planning was integrated into assessments, treatment planning, or interventions.</li> </ul>                                                                                                                                                                                                                                                                                                                                                                                                                                              |

*Teamwork in Assertive Community Treatment (TACT)*

| <b>Appendix A: TACT Definitions and Items</b> |                                                                                          |                                                                                                                                                                                                                                            |
|-----------------------------------------------|------------------------------------------------------------------------------------------|--------------------------------------------------------------------------------------------------------------------------------------------------------------------------------------------------------------------------------------------|
| <b>Construct</b>                              | <b>Definition</b>                                                                        | <b>Items</b>                                                                                                                                                                                                                               |
|                                               | consumer-specific contexts and conditions in their treatment planning and interventions. | <ul style="list-style-type: none"><li>• Skill building was integrated into assessments, treatment planning, or interventions.</li><li>• Natural supports were integrated into assessments, treatment planning, or interventions.</li></ul> |

Teamwork in Assertive Community Treatment (TACT)

**Appendix B. Factor Loadings from Exploratory Factor Analysis with Promax Rotation of 1st Wave**<sup>1,2</sup>

| Variable                    | Exploitation | Psych Safety | Enctr Prep | Cons Ctrd | Conflict | Exploration | Goal Agree | Const Contr | Info Access |
|-----------------------------|--------------|--------------|------------|-----------|----------|-------------|------------|-------------|-------------|
| Safety personal issue       | 0.064        | 0.608        | 0.118      | -0.068    | 0.021    | -0.124      | 0.025      | -0.001      | -0.025      |
| Safety mistake              | -0.022       | 0.462        | 0.026      | 0.055     | 0.016    | 0.041       | 0.046      | 0.131       | -0.048      |
| Safety problems             | 0.035        | 0.344        | 0.096      | -0.053    | -0.023   | 0.139       | -0.029     | 0.224       | -0.057      |
| Safety tolerance            | -0.067       | 0.673        | -0.119     | 0.035     | -0.036   | 0.019       | 0.014      | 0.076       | 0.014       |
| Safety take risk            | 0.005        | 0.642        | -0.012     | -0.099    | -0.081   | 0.103       | -0.058     | 0.002       | -0.043      |
| Safety skill valued         | 0.023        | 0.536        | 0.090      | -0.119    | -0.071   | -0.029      | -0.012     | 0.211       | 0.032       |
| Safety change time          | 0.016        | 0.527        | -0.090     | -0.002    | 0.084    | -0.009      | 0.049      | -0.052      | 0.119       |
| Safety ask company          | 0.059        | 0.693        | -0.056     | 0.159     | -0.046   | 0.008       | -0.048     | -0.065      | 0.163       |
| Conflict get along          | -0.029       | -0.032       | -0.003     | -0.025    | 0.634    | -0.006      | 0.114      | -0.180      | 0.073       |
| Conflict person clash       | 0.003        | -0.001       | -0.031     | 0.023     | 0.760    | 0.065       | 0.010      | 0.017       | 0.018       |
| Conflict ideas              | 0.010        | -0.045       | 0.041      | -0.085    | 0.743    | -0.015      | -0.208     | 0.067       | 0.062       |
| Conflict diff opinions      | 0.053        | -0.003       | 0.046      | 0.076     | 0.523    | -0.066      | -0.042     | -0.050      | -0.075      |
| Conflict respect            | -0.046       | 0.132        | -0.050     | 0.075     | -0.097   | -0.108      | -0.014     | 0.608       | 0.087       |
| Conflict understand         | 0.074        | 0.066        | -0.079     | 0.140     | -0.052   | -0.100      | -0.004     | 0.657       | 0.083       |
| Goal safety                 | 0.028        | 0.181        | 0.087      | -0.070    | 0.020    | 0.032       | 0.454      | 0.118       | 0.120       |
| Goal quality                | 0.032        | -0.053       | 0.046      | -0.017    | -0.050   | 0.015       | 0.901      | -0.031      | 0.008       |
| Goal productivity           | 0.055        | -0.010       | 0.037      | -0.014    | 0.032    | 0.032       | -0.666     | 0.043       | -0.061      |
| Info from meeting           | 0.039        | 0.233        | -0.007     | -0.023    | 0.019    | 0.059       | 0.186      | -0.102      | 0.457       |
| Info from peers             | -0.072       | 0.184        | 0.118      | 0.008     | 0.121    | -0.025      | 0.044      | 0.178       | 0.625       |
| Info notes current          | -0.033       | -0.074       | 0.078      | 0.164     | -0.187   | 0.121       | -0.087     | 0.153       | 0.251       |
| Info intervention discussed | 0.067        | -0.120       | -0.038     | 0.314     | -0.090   | 0.089       | 0.036      | 0.206       | 0.367       |
| Know consumer involvement   | -0.058       | 0.015        | 0.585      | 0.063     | 0.129    | -0.014      | 0.002      | -0.025      | -0.060      |
| Know schedule               | -0.061       | 0.070        | 0.620      | -0.031    | -0.146   | -0.021      | 0.069      | 0.041       | -0.070      |
| Know diagnosis              | 0.049        | -0.012       | 0.649      | -0.100    | -0.023   | 0.014       | 0.003      | -0.014      | 0.132       |
| Know function assess        | -0.076       | 0.022        | 0.601      | 0.081     | 0.033    | 0.129       | -0.066     | -0.076      | 0.041       |
| Know rehab intervention     | -0.019       | 0.036        | 0.554      | 0.179     | 0.051    | -0.071      | 0.043      | -0.070      | 0.134       |

*Teamwork in Assertive Community Treatment (TACT)*

**Appendix B. Factor Loadings from Exploratory Factor Analysis with Promax Rotation of 1st Wave<sup>1,2</sup>**

| Variable                    | Exploitation | Psych Safety | Enctr Prep | Cons Ctrd | Conflict | Exploration | Goal Agree | Const Contr | Info Access |
|-----------------------------|--------------|--------------|------------|-----------|----------|-------------|------------|-------------|-------------|
| Know relate observation     | 0.095        | -0.175       | 0.524      | 0.121     | 0.004    | -0.042      | 0.069      | -0.028      | 0.014       |
| Know code rehab             | 0.216        | -0.058       | 0.384      | 0.177     | -0.075   | -0.002      | -0.030     | -0.034      | -0.038      |
| Know consumer participation | -0.030       | -0.080       | 0.102      | 0.378     | -0.034   | 0.087       | -0.064     | 0.075       | -0.007      |
| Know integration            | 0.052        | -0.006       | 0.079      | 0.830     | 0.022    | -0.016      | 0.047      | -0.024      | -0.075      |
| Know skill building         | 0.004        | 0.096        | 0.090      | 0.863     | 0.055    | -0.039      | -0.015     | -0.003      | 0.003       |
| Know natural support        | -0.095       | -0.060       | -0.034     | 0.606     | -0.022   | 0.029       | -0.020     | 0.152       | 0.092       |
| Learn review manual         | 0.152        | -0.047       | 0.077      | -0.069    | 0.081    | 0.618       | 0.068      | 0.189       | -0.065      |
| Learn review newsletter     | -0.006       | -0.003       | -0.018     | 0.111     | 0.058    | 0.737       | 0.122      | 0.098       | -0.083      |
| Learn act training          | -0.008       | 0.138        | -0.088     | 0.104     | -0.051   | 0.761       | -0.023     | -0.242      | 0.032       |
| Learn other training        | 0.116        | 0.043        | 0.143      | -0.008    | -0.040   | 0.570       | -0.173     | -0.209      | 0.100       |
| Learn observation           | 0.069        | -0.187       | -0.068     | -0.136    | -0.057   | 0.448       | -0.008     | -0.059      | 0.204       |
| Learn from peers            | 0.531        | -0.051       | 0.050      | 0.036     | -0.104   | -0.017      | -0.084     | 0.216       | 0.132       |
| Learn select change         | 0.716        | -0.005       | 0.014      | 0.003     | 0.041    | 0.156       | 0.013      | 0.124       | -0.084      |
| Learn implement change      | 0.821        | -0.012       | -0.111     | 0.022     | 0.106    | 0.075       | 0.050      | 0.058       | -0.028      |
| Learn analyze problem       | 0.922        | 0.057        | -0.031     | -0.012    | -0.033   | -0.111      | 0.009      | -0.105      | 0.034       |
| Learn evaluate change       | 0.856        | -0.001       | -0.020     | -0.008    | -0.004   | 0.010       | -0.022     | -0.083      | 0.011       |
| Learn reflect               | 0.638        | 0.085        | 0.126      | -0.061    | 0.003    | 0.043       | -0.003     | -0.017      | -0.042      |

*Teamwork in Assertive Community Treatment (TACT)*

1. Four candidate items that loaded on single-item factors in an initial EFA were dropped from the scale and excluded from this analysis.
2. Highlights indicate item-to-factor assignments.
